# Supplementary material for: Metabonomic Study on the Plasma of High-Fat Diet-Induced Dyslipidemia Rats Treated with Ge Gen Qin Lian Decoction by Ultrahigh-Performance Liquid Chromatography-Mass Spectrometry
Source: Hindawi journal article supplement (doi:10.1155/2021/6692456), 2021-06-05
Supplement: f1 [file 6692456.f1.zip]

Table S2

The relative standard deviation (RSDs,%) of the retention time and the peak area of 6 selected peaks in the quality control samples in positive ESI modes.

| Peak no. | m/z value | RT   | Peak area | Number |
|----------|-----------|------|-----------|--------|
| 1        | 190.0851  | 0.10 | 2.04      | 6      |
| 2        | 355.2616  | 0.07 | 1.13      | 6      |
| 3        | 502.2928  | 0.10 | 3.58      | 6      |
| 4        | 373.2723  | 0.07 | 1.73      | 6      |
| 5        | 431.2756  | 0.10 | 2.96      | 6      |
| 6        | 452.1537  | 0.17 | 3.26      | 6      |
