# Supplementary material for: Metabonomic Study on the Plasma of High-Fat Diet-Induced Dyslipidemia Rats Treated with Ge Gen Qin Lian Decoction by Ultrahigh-Performance Liquid Chromatography-Mass Spectrometry
Source: Hindawi journal article supplement (doi:10.1155/2021/6692456), 2021-06-05
Supplement: f1 [file 6692456.f1.zip]

Supplementary Table 1: The Lee's Index of Rats were fed high fat diet for four weeks

| Table S1 Rats were fed high fat diet for four weeks ( $\bar{x} \pm s$ ) |   |                        |
|-------------------------------------------------------------------------|---|------------------------|
| Group                                                                   | N | Lee's Index            |
| Control                                                                 | 8 | $294.72 \pm 3.19$      |
| Model                                                                   | 8 | $305.59 \pm 3.75^{##}$ |
| Administrated                                                           | 8 | $304.10 \pm 5.01^{##}$ |
| Note: Compared with the normal group, $^{##}P < 0.01$                   |   |                        |
